# Supplementary material for: Improvement in Quality of Life with Pelvic Floor Muscle Training and Biofeedback in Patients with Painful Bladder Syndrome/Interstitial Cystitis
Source: PubMed Central journal article supplement (PMC7922867; doi:10.3390/jcm10040862), 2021-02-19
Supplement: jcm-10-00862-s001.pdf [file jcm-10-00862-s001.pdf]

HOSPITAL CLÍNICO UNIVERSITARIO DE SALAMANCA  
FACULTAD DE MEDICINA  
SERVICIO DE UROLOGÍA

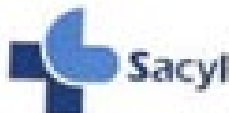

Esta encuesta tiene por objetivo conocer y valorar el Estado de Salud y Calidad de Vida Relacionada con la Salud en pacientes ATENDIDOS POR CISTOPATÍA INTERSTICIAL O SÍNDROME DE VEJIGA DOLOROSA. El cuestionario es anónimo. Los datos e información contenidos son confidenciales y secretos y su tratamiento/proceso será únicamente estadístico. Su uso se destina exclusivamente a los objetivos de esta investigación.

Las preguntas que siguen se refieren a lo que usted piensa sobre su salud. Sus respuestas permitirán saber cómo se encuentra usted y hasta qué punto es capaz de hacer sus actividades habituales. Conteste cada pregunta tal como se indica. Si no está seguro/a de cómo responder a una pregunta, por favor conteste lo que le parezca más cierto.

Gracias por su colaboración.

CUESTIONARIO

NºHC: \_\_\_\_\_

Sexo:  Varón  Mujer

Edad: \_\_\_\_\_ años

PROFESIÓN/OCUPACIÓN: \_\_\_\_\_

**ESTILO DE VIDA:**

Consumo de tabaco: .....paquetes/año.

Exposición a anilinas.....

Exposición a fenacetina, clornafazina.....

Exposición a ciclofosfamida.....

Exposición a radiación.....

Otros

Nivel de estudios:  Ninguno

Estudios 1<sup>os</sup>

Estudios medios (Bachillerato, Formación Profesional)

Estudios superiores o universitarios

**Comorbilidad: ¿padecen algún tipo de enfermedad o dolencia?**

No

Sí. **Indicar:**

Enfermedades del corazón

Tensión arterial alta

Asma o enfermedad pulmonar

Diabetes

Úlcera o enfermedad estomacal

Enfermedad intestinal

Enfermedad de los riñones

Enfermedad del SNC

Anemia u otra enfermedad de la sangre

- Cáncer
- Depresión
- Enfermedad locomotora o articular
- Otro problema médico: \_

**VRS** MARQUE UNA SOLA RESPUESTA

**1. En general, usted diría que su salud es:**

- 1  Excelente
- 2  Muy buena
- 3  Buena
- 4  Regular
- 5  Mala

**2. ¿Cómo diría que es su salud actual, comparada con la de hace un año?**

- 1  Mucho mejor ahora que hace un año
- 2  Algo mejor ahora que hace un año
- 3  Más o menos igual que hace un año
- 4  Algo peor ahora que hace un año
- 5  Mucho peor ahora que hace un año

LAS SIGUIENTES PREGUNTAS SE REFIEREN A ACTIVIDADES O COSAS QUE USTED PODRÍA HACER EN UN DÍA NORMAL.

**3. Su salud actual, ¿le limita para hacer esfuerzos intensos, tales como correr, levantar objetos pesados, o participar en deportes agotadores?**

- 1  Sí, me limita mucho
- 2  Sí, me limita un poco
- 3  No, no me limita nada

**4. Su salud actual, ¿le limita para hacer esfuerzos moderados, como mover una mesa, pasar la aspiradora, jugar a los bolos o caminar más de una hora?**

- 1  Sí, me limita mucho
- 2  Sí, me limita un poco
- 3  No, no me limita nada

**5. Su salud actual, ¿le limita para coger o llevar la bolsa de la compra?**

- 1  Sí, me limita mucho
- 2  Sí, me limita un poco
- 3  No, no me limita nada

**6. Su salud actual, ¿le limita para subir varios pisos por la escalera?**

- 1  Sí, me limita mucho
- 2  Sí, me limita un poco
- 3  No, no me limita nada

**7. Su salud actual, ¿le limita para subir un solo piso por la escalera?**

- 1  Sí, me limita mucho
- 2  Sí, me limita un poco
- 3  No, no me limita nada

**8. Su salud actual, ¿le limita para agacharse o arrodillarse?**

- 1  Sí, me limita mucho
- 2  Sí, me limita un poco
- 3  No, no me limita nada

**9. Su salud actual, ¿le limita para caminar un kilómetro o más?**

- 1  Sí, me limita mucho
- 2  Sí, me limita un poco
- 3  No, no me limita nada

**10. Su salud actual, ¿le limita para caminar varias manzanas (varios centenares de metros)?**

- 1  Sí, me limita mucho
- 2  Sí, me limita un poco
- 3  No, no me limita nada

**11. Su salud actual, ¿le limita para caminar una sola manzana (unos 100 metros)?**

- 1  Sí, me limita mucho
- 2  Sí, me limita un poco
- 3  No, no me limita nada

**12. Su salud actual, ¿le limita para bañarse o vestirse por sí mismo?**

- 1  Sí, me limita mucho
- 2  Sí, me limita un poco
- 3  No, no me limita nada

LAS SIGUIENTES PREGUNTAS SE REFIEREN A PROBLEMAS EN SU TRABAJO O EN SUS ACTIVIDADES COTIDIANAS.

**13. Durante las 4 últimas semanas, ¿tuvo que reducir el tiempo dedicado al trabajo o a sus actividades cotidianas, a causa de su salud física?**

- 1  Sí
- 2  No

**14. Durante las 4 últimas semanas, ¿hizo menos de lo que hubiera querido hacer, a causa de su salud física?**

- 1  Sí
- 2  No

**15. Durante las 4 últimas semanas, ¿tuvo que dejar de hacer algunas tareas en su trabajo o en sus actividades cotidianas, a causa de su salud física?**

- 1  Sí
- 2  No

**16. Durante las 4 últimas semanas, ¿tuvo dificultad para hacer su trabajo o sus actividades cotidianas (por ejemplo, le costó más de lo normal), a causa de su salud física?**

- 1  Sí
- 2  No

**17. Durante las 4 últimas semanas, ¿tuvo que reducir el tiempo dedicado al trabajo o a sus actividades cotidianas, a causa de algún problema emocional (como estar triste, deprimido o nervioso)?**

- 1  Sí
- 2  No

**18. Durante las 4 últimas semanas, ¿hizo menos de lo que hubiera querido hacer, a causa de algún problema emocional (como estar triste, deprimido o nervioso)?**

- 1  Sí
- 2  No

**19. Durante las 4 últimas semanas, ¿no hizo su trabajo o sus actividades cotidianas tan cuidadosamente como de costumbre, a causa de algún problema emocional (como estar triste, deprimido o nervioso)?**

- 1  Sí
- 2  No

**20. Durante las 4 últimas semanas, ¿hasta qué punto su salud física o los problemas emocionales han dificultado sus actividades sociales habituales con la familia, los amigos, los vecinos u otras personas?**

- 1  Nada
- 2  Un poco
- 3  Regular
- 4  Bastante
- 5  Mucho

**21. ¿Tuvo dolor en alguna parte del cuerpo durante las 4 últimas semanas?**

- 1  No, ninguno
- 2  Sí, muy poco
- 3  Sí, un poco
- 4  Sí, moderado
- 5  Sí, mucho
- 6  Sí, muchísimo

**22. Durante las 4 últimas semanas, ¿hasta qué punto el dolor le ha dificultado su trabajo habitual (incluido el trabajo fuera de casa y las tareas domésticas)?**

- 1  Nada
- 2  Un poco
- 3  Regular
- 4  Bastante
- 5  Mucho

LAS PREGUNTAS QUE SIGUEN SE REFIEREN A CÓMO SE HA SENTIDO Y CÓMO LE HAN IDO LAS COSAS DURANTE LAS **4 ÚLTIMAS SEMANAS**. EN CADA PREGUNTA RESPONDA LO QUE SE PAREZCA MÁS A CÓMO SE HA SENTIDO USTED.

**23. Durante las 4 últimas semanas, ¿cuánto tiempo se sintió lleno de vitalidad?**

- 1  Siempre
- 2  Casi siempre
- 3  Muchas veces
- 4  Algunas veces
- 5  Sólo alguna vez
- 6  Nunca

**24. Durante las 4 últimas semanas, ¿cuánto tiempo estuvo muy nervioso?**

- 1  Siempre
- 2  Casi siempre
- 3  Muchas veces
- 4  Algunas veces
- 5  Sólo alguna vez
- 6  Nunca

**25. Durante las 4 últimas semanas, ¿cuánto tiempo se sintió tan bajo de moral que nada podía animarle?**

- 1  Siempre
- 2  Casi siempre
- 3  Muchas veces
- 4  Algunas veces
- 5  Sólo alguna vez
- 6  Nunca

**26. Durante las 4 últimas semanas, ¿cuánto tiempo se sintió calmado y tranquilo?**

- 1  Siempre
- 2  Casi siempre
- 3  Muchas veces
- 4  Algunas veces
- 5  Sólo alguna vez
- 6  Nunca

**27. Durante las 4 últimas semanas, ¿cuánto tiempo tuvo mucha energía?**

- 1  Siempre
- 2  Casi siempre
- 3  Muchas veces
- 4  Algunas veces
- 5  Sólo alguna vez
- 6  Nunca

**28. Durante las 4 últimas semanas, ¿cuánto tiempo se sintió desanimado y triste?**

- 1  Siempre
- 2  Casi siempre
- 3  Muchas veces
- 4  Algunas veces
- 5  Sólo alguna vez
- 6  Nunca

**29. Durante las 4 últimas semanas, ¿cuánto tiempo se sintió agotado?**

- 1  Siempre
- 2  Casi siempre
- 3  Muchas veces
- 4  Algunas veces
- 5  Sólo alguna vez
- 6  Nunca

**30. Durante las 4 últimas semanas, ¿cuánto tiempo se sintió feliz?**

- 1  Siempre
- 2  Casi siempre

- 3  Muchas veces
- 4  Algunas veces
- 5  Sólo alguna vez
- 6  Nunca

**31. Durante las 4 últimas semanas, ¿cuánto tiempo se sintió cansado?**

- 1  Siempre
- 2  Casi siempre
- 3  Muchas veces
- 4  Algunas veces
- 5  Sólo alguna vez
- 6  Nunca

**32. Durante las 4 últimas semanas, ¿con qué frecuencia la salud física o los problemas emocionales le han dificultado sus actividades sociales (como visitar a los amigos o familiares)?**

- 1  Siempre
- 2  Casi siempre
- 3  Algunas veces
- 4  Sólo alguna vez
- 5  Nunca

POR FAVOR, DIGA SI LE PARECE CIERTA O FALSA CADA UNA DE LAS SIGUIENTES FRASES.

**33. Creo que me pongo enfermo más fácilmente que otras personas.**

- 1  Totalmente cierta
- 2  Bastante cierta
- 3  No lo sé
- 4  Bastante falsa
- 5  Totalmente falsa

**34. Estoy tan sano como cualquiera.**

- 1  Totalmente cierta
- 2  Bastante cierta
- 3  No lo sé
- 4  Bastante falsa
- 5  Totalmente falsa

**35. Creo que mi salud va a empeorar.**

- 1  Totalmente cierta
- 2  Bastante cierta
- 3  No lo sé
- 4  Bastante falsa
- 5  Totalmente falsa

**36. Mi salud es excelente.**

- 1  Totalmente cierta
- 2  Bastante cierta
- 3  No lo sé
- 4  Bastante falsa
- 5  Totalmente falsa

**Fecha:** \_\_\_\_\_

Observaciones:

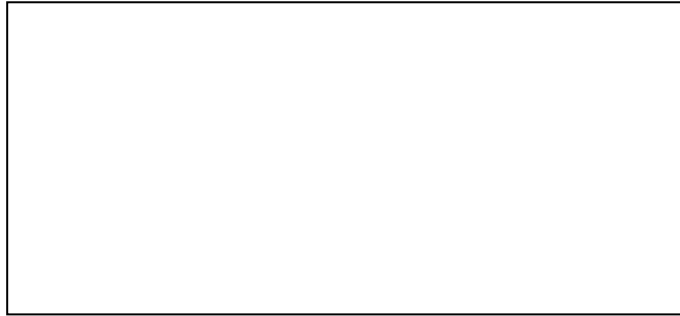

Questionary Reference:

Questionario de calidad de vida por síntomas urinarios (Alonso J, Prieto L, Antó JM. La versión española de SF 36 Health Survey (Questionario de Salud SF 36): in instrumento para la medida de resultados clínicos. Med Clin (Barc) 1995; 104: 771-76.): Adaptación del Prof Dr D José Antonio Mirón Canelo. Departamento de Medicina y Salud Pública de la Facultad de Medicina de Salamanca.
